# Supplementary material for: A Long QT Mutation Substitutes Cholesterol for Phosphatidylinositol-4,5-Bisphosphate in KCNQ1 Channel Regulation
Source: PubMed Central journal article supplement (PMC3969324; doi:10.1371/journal.pone.0093255), 2014-03-28
Supplement: pone.0093255.s001.pdf [file pone.0093255.s001.pdf]

## Supplemental figures

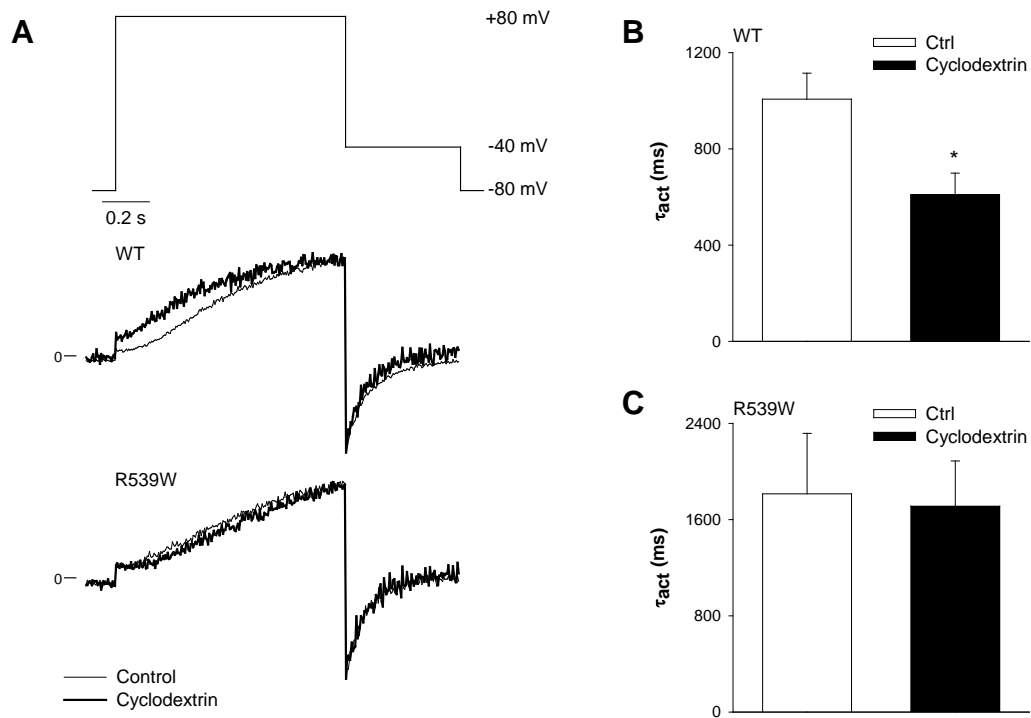

**Figure S1**

**Effect of cyclodextrin on WT and R539W activation kinetics.** A, Representative recording of a COS-7 cell transfected with WT or R539W KCNE1-KCNQ1 concatemer channel, without and with 1-hour pre-treatment by 2 mmol/L cyclodextrin. B and C, Mean  $\pm$  sem of WT and R539W activation tau from monoexponential fit of activation without and with cyclodextrin pre-treatment. \*  $p < 0.05$ .

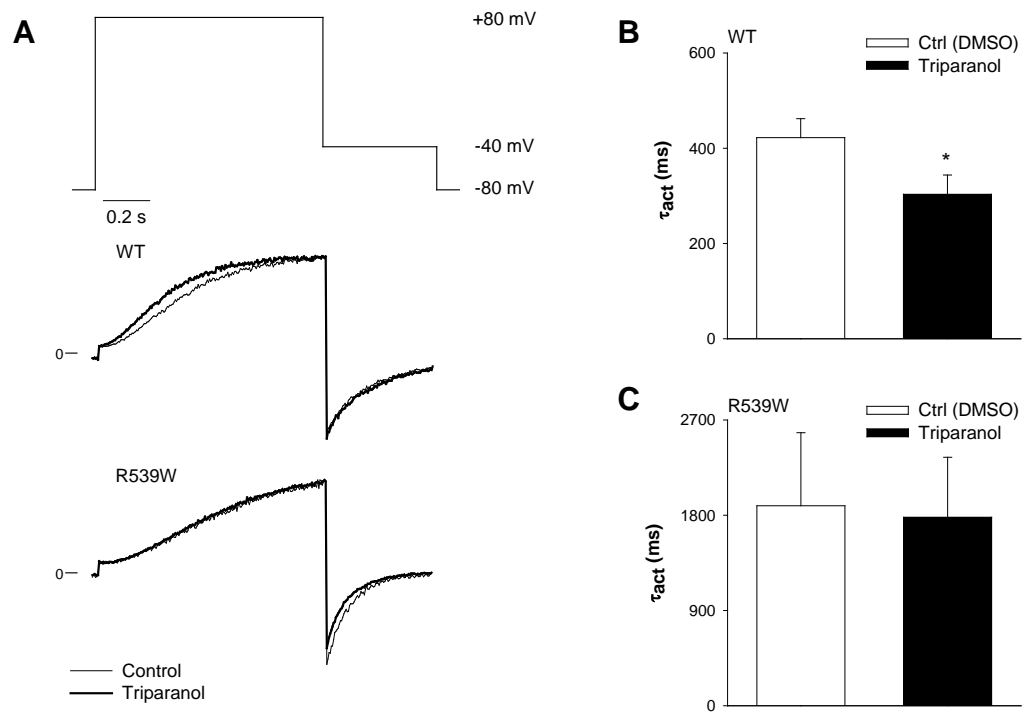

**Figure S2**

**Effect of triparanol on WT and R539W activation kinetics.** A, Representative recording of a COS-7 cell transfected with WT or R539W KCNE1-KCNQ1 concatemer channel, without and with 24-hour pre-treatment by 10  $\mu\text{mol/L}$  triparanol. B and C, Mean  $\pm$  sem of WT and R539W activation tau from monoexponential fit of activation without and with triparanol pre-treatment. \*  $p < 0.05$ .

## Supplemental tables

|                                  | WT   |      | R243H |      | R539W |      | R555C |      |
|----------------------------------|------|------|-------|------|-------|------|-------|------|
| Time (s)                         | 0    | 63   | 0     | 63   | 0     | 63   | 0     | 63   |
| Mean of current density (pA/pF)  | 112  | 98.4 | 40.7  | 31.8 | 85.5  | 83.3 | 63.0  | 52.7 |
| SEM                              | 21.0 | 17.3 | 13.1  | 10.8 | 13.2  | 13.0 | 27.6  | 24.0 |
| n                                | 7    | 7    | 5     | 5    | 7     | 7    | 5     | 5    |
| p value (one-tail paired t-test) | 0.03 |      | 0.02  |      | 0.24  |      | 0.03  |      |
| Significant difference           | YES  |      | YES   |      | NO    |      | YES   |      |

Table S1: Wortmannin-induced rundown.

|                                     | WT    |      | R243H |       | R539W |       | R555C |       |
|-------------------------------------|-------|------|-------|-------|-------|-------|-------|-------|
| Time (s)                            | 0     | 25   | 0     | 25    | 0     | 25    | 0     | 25    |
| Mean of tail current amplitude (pA) | -406  | -167 | -171  | -28.4 | -72.8 | -54.8 | -110  | -7.43 |
| SEM                                 | 148   | 57.7 | 80.8  | 12.6  | 11.8  | 12.1  | 24.7  | 1.81  |
| n                                   | 11    | 11   | 6     | 6     | 6     | 6     | 6     | 6     |
| p value (one-tail paired t-test)    | 0.021 |      | 0.046 |       | 0.043 |       | 0.005 |       |
| Significant difference              | YES   |      | YES   |       | YES   |       | YES   |       |

Table S2: Magnesium-induced rundown.

|                                      | WT   |      | R243H |      | R539W |      | R555C |      | WT without Ci-VSP |      |
|--------------------------------------|------|------|-------|------|-------|------|-------|------|-------------------|------|
| Time (s)                             | 0    | 64   | 0     | 64   | 0     | 64   | 0     | 64   | 0                 | 64   |
| Mean of tail current density (pA/pF) | 25.4 | 10.2 | 6.87  | 1.57 | 5.47  | 5.88 | 0.00  | 0.00 | 13.4              | 13.3 |
| SEM                                  | 6.15 | 2.81 | 2.06  | 0.55 | 1.19  | 1.49 | 0.00  | 0.00 | 7.64              | 8.20 |
| n                                    | 11   | 11   | 6     | 6    | 9     | 9    | 7     | 7    | 7                 | 7    |
| P value (one-tail paired t-test)     | 0.01 |      | 0.01  |      | 0.38  |      | N/A   |      | 0.45              |      |
| Significant difference               | YES  |      | YES   |      | NO    |      | N/A   |      | NO                |      |

Table S3: Ci-VSP-induced rundown.
